# Supplementary material
Source: PubMed Central journal article supplement (PMC4892343)
Supplement: NIHMS52707-supplement-Supplementary_Figures_and_Table.pdf [file NIHMS52707-supplement-Supplementary_Figures_and_Table.pdf]

## Supplementary Information

- Eight Supplementary Figures and their legends
- Supplementary Table I: List of primers

Figure S1

**A**

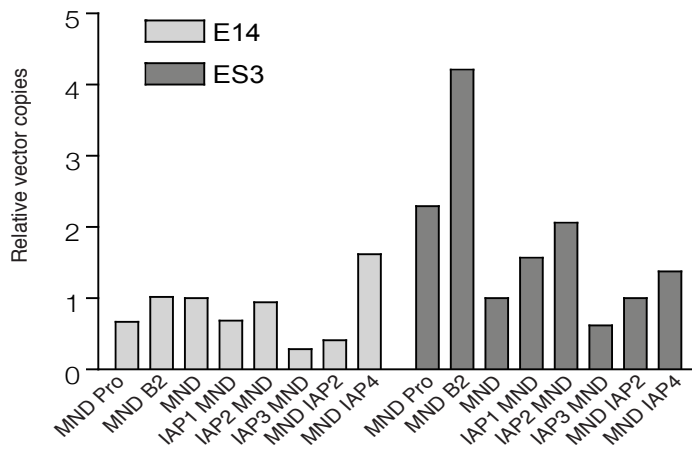

**B**

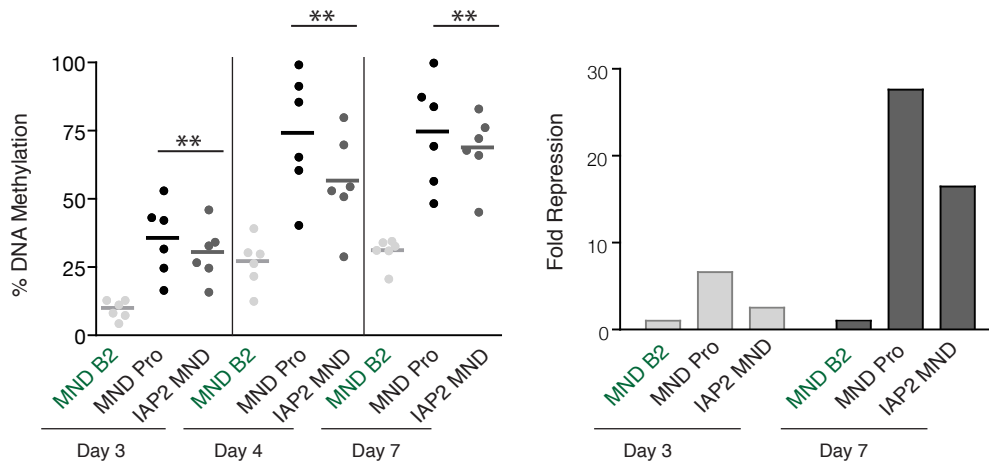

Figure S1, related to Figure 1: **ERV sequences can induce rapid *de novo* DNA methylation in ES cells**

**A)** Genomic DNA samples from Figure 1B-C (time-point day 4) were used to measure relative vector copies by Q-PCR, to verify that repressed vectors did not represent non-integrated samples. **B)** *De novo* methylation and repression are rapid and progressive thereafter. Left: ERV-containing (Pro or IAP2) vectors or a control vector (B2) were measured for their levels of promoter methylation at 3, 4 or 7 days post transduction. Right: In parallel, fold repression was recorded at days 3 and 7 post transduction. Left p values: Day3: MND B2 vs. MND Pro (0.0016) or vs. IAP2 MND (0.0009); Day4: MND B2 vs. MND Pro (0.0007) or vs. IAP2 MND (0.0011); Day7: MND B2 vs. MND Pro (0.0016) or vs. IAP2 MND (0.0001).

Figure S2

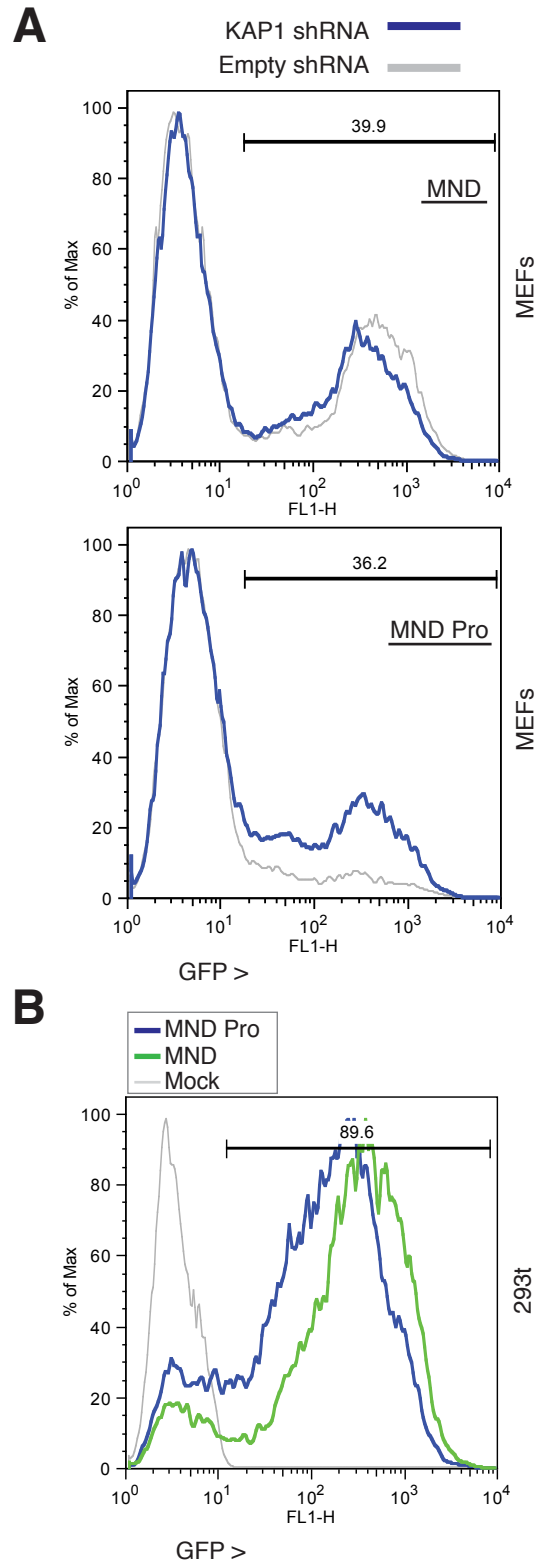

Figure S2, related to Figure 2: **ERV DNA methylation patterns are conditioned by KRAB-ZFP expression profiles**

Reversibility of MND Pro silencing in MEFs and 293t cells where levels of DNA methylation induced are very low. **A)** MEFs shown in Figure 2B transduced with either the MND or MND Pro vector were cultured for 2 weeks and then transduced with shRNA vectors that were Puromycin selected (either against KAP1 or with an empty vector control) as stated. One week later, GFP was analysed by flow cytometry. **B)** 293t cells from Figure 2E transduced with either the MND or MND Pro vectors and transfected with ZFP809 and then washed and maintained for 5 days longer to allow loss of ZFP809 expression and reversibility of Pro repression.

Figure S3

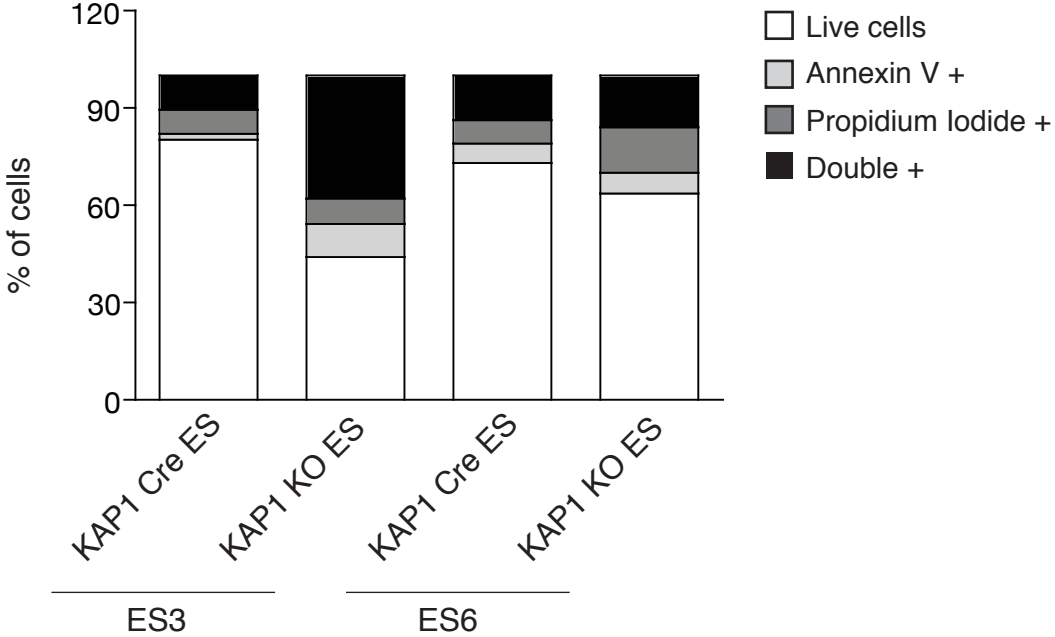

Figure S3, related to Figure 3: **KAP1 and ESET are required for *de novo* DNA methylation of ERVs**

KAP1 knockout is lethal in ES cells around 4-5 days post *Kap1*- excision. Cells were therefore assessed for DNA methylation at 3 days post *Kap1*-excision (see Figure 3). Here, *Kap1* *LoxP*-flanked cells were transduced with a 4-OHT inducible Cre vector in the absence (KAP1 Cre ES) or presence (KAP1 KO ES) of 4-OHT. Two cell lines are shown (ES3 and ES6). Four days post *Kap1*- excision, cells were harvested, stained and assessed for cell death by flow cytometry. Note that cell death is underestimated since some cells die and detach before harvesting.

Figure S4

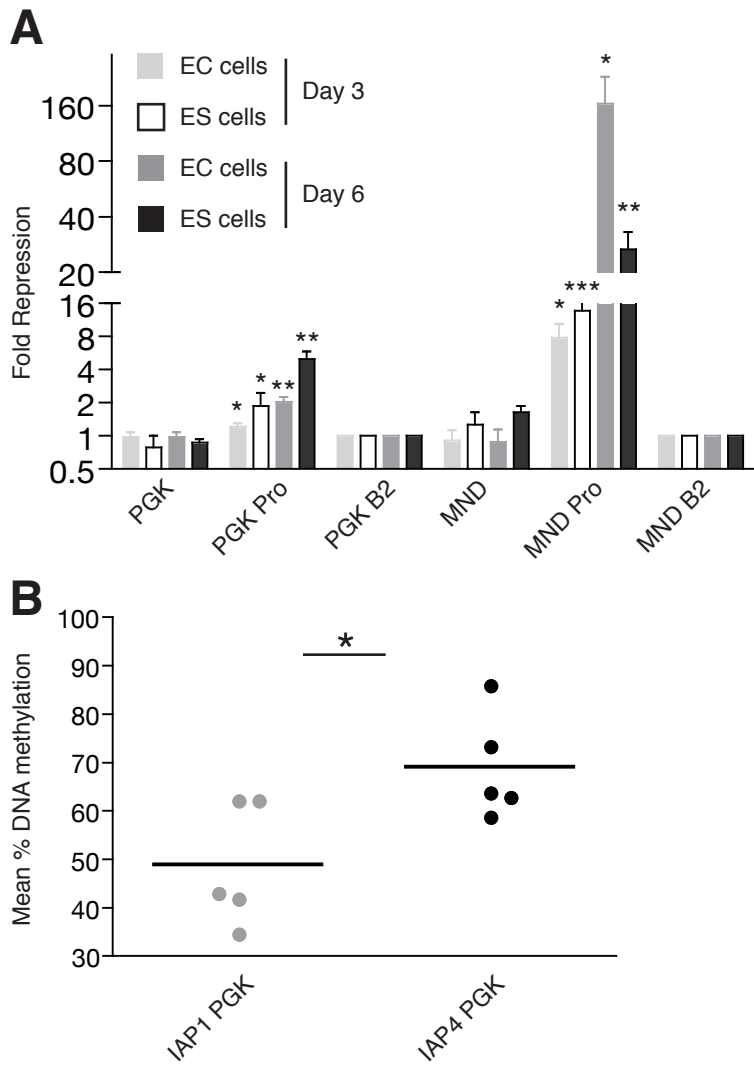



Figure S4, related to Figure 5: **ERV sequences can induce repression and DNA methylation of a cellular promoter**

**A)** Side-by-side comparison of repression of the MND promoter vs. the cellular promoter PGK at day3 and day6 post vector transduction of F9 EC cells and ES cells. Results were normalized to expression in 3T3 cells and fold repression of PGK vectors was normalized to the PGK B2 control vector, while MND vectors were normalized to the MND B2 control vector. Bars show means and s.d. of triplicate infections. P values (unpaired two-tailed *t* tests) for the PGK Pro vector vs. the PGK control: EC day3,  $p=0.0492$ ; ES day3,  $p=0.0406$ ; EC day6,  $p=0.0016$ ; ES day6,  $p=0.0012$ . For the MND Pro vector vs. the MND control: EC day3,  $p=0.0119$ ; ES day3,  $p=0.0009$ ; EC day6,  $p=0.0125$ ; ES day6,  $p=0.0026$ . **B)** ERV sequences can direct *de novo* methylation of the PGK promoter *in vivo*. Lentiviral transgenesis was performed with either the IAP4 PGK vector or a control vector, IAP1 (see Figure 1) PGK that escapes repression. 5 embryos per group were assessed for DNA methylation of the PGK promoter.  $P=0.0270$ .

Figure S5

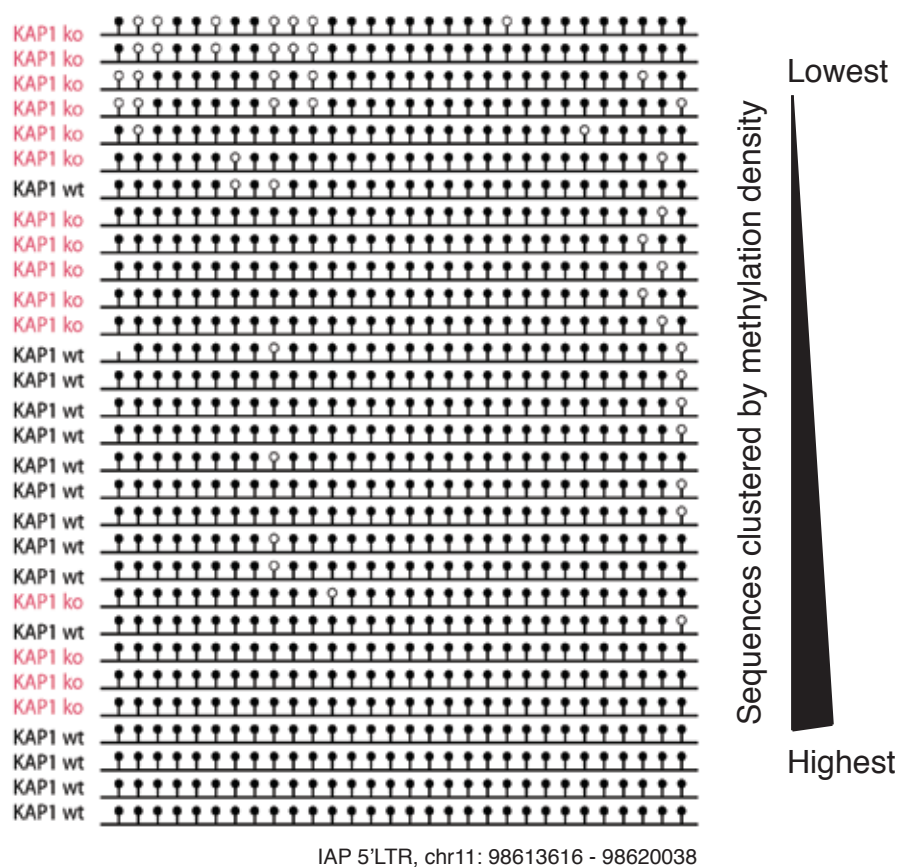

Figure S5, related to Figure 6: **KAP1 shapes DNA methylation of endogenous retroviruses in ES cells and embryos**

Bisulphite sequencing with TOPO cloning showing the difference in DNA methylation status between molecules at one IAP locus. KAP1 knockout (ko) ES cell samples shown in red and wildtype (wt) ones in black. Sequences are ordered depending on methylation density. Unfilled and filled lollipops represent unmethylated and methylated CpGs respectively.

Figure S6

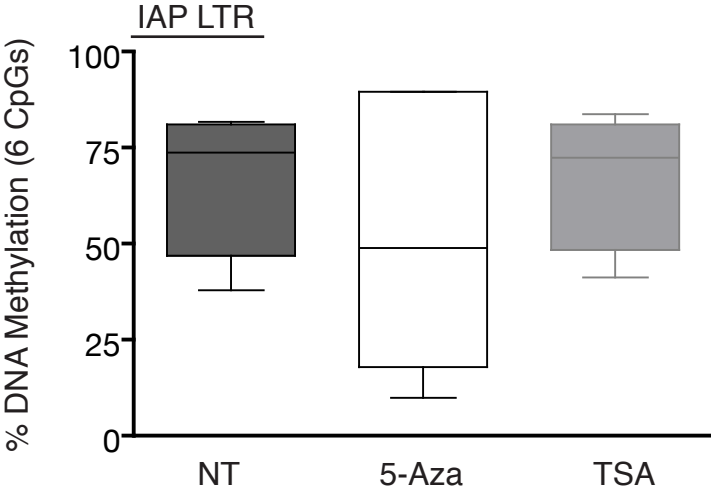

Figure S6, related to Figure 7: **DNA methylation of introduced ERV sequences and resident ERVs becomes critical late in development**

MEFs from Figure 7AB (line PGK Pro 1.) were used for DNA methylation analysis by bisulphite pyrosequencing at endogenous IAPs in parallel to the expression analysis shown in Figure 7B. DNA methylation was reduced in the 5-Aza treated group.

Figure S7

E5.5 Embryos

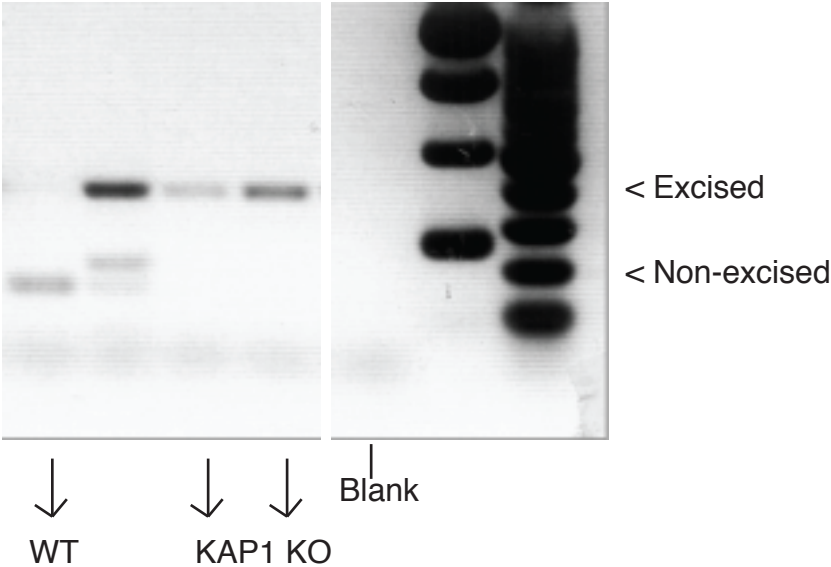

Figure S7, related to Figure 6: **KAP1 shapes DNA methylation of endogenous retroviruses in ES cells and embryos**

*Kap1* heterozygous mice were crossed and embryos dissected at E5.5 to measure DNA methylation of endogenous IAPs. Here the results of the genotyping that was done by PCR with a mix of three primers (see Figure 3) are shown. 171- and 390-bp products represent *loxP*-flanked or excised *Kap1*, respectively. Embryos selected for analysis (two knockouts and one WT embryo) are labelled. The image shows two parts of the same gel but all at the same exposure and analysis settings.

**Figure S8**

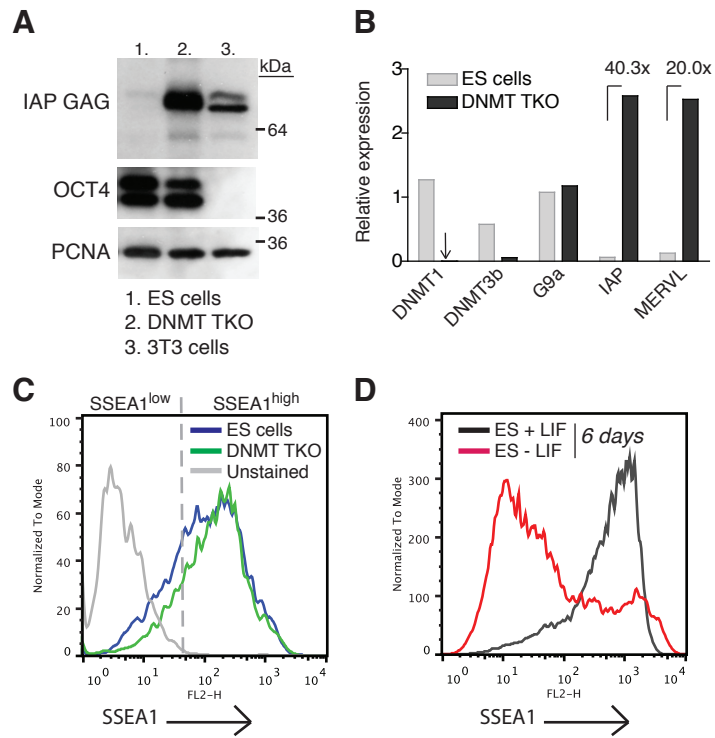



Figure S8, related to Figure 7: **DNA methylation of introduced ERV sequences and resident ERVs becomes critical late in development**

**A)** Accumulation of IAP GAG p73 in DNA methyltransferase triple knockout ES cells (DNMT TKO). 3T3 cells were a positive control since they overexpress IAP GAG. Global OCT4 protein levels were comparable between WT and TKO ES cells. **B)** qRT-PCR showing upregulation of IAP and MERVL transcripts in DNMT TKO cells. Samples were normalized to *Gapdh* and G9a levels were also similar between samples while DNMT1 and 3B were verified to be absent in DNMT TKO cells. **C)** WT and DNMT TKO ES cells were stained with an anti-SSEA1 antibody or left unstained and histogram results overlaid to verify that cells were largely undifferentiated. **D)** In another experiment, ES cells were cultured for six days in the presence or absence of LIF and then stained as in C) above to verify that cells downregulate SSEA1 upon differentiation to validate its use as a marker of undifferentiation in C).

## Supplementary Table I: Primer sequences

### qRT-PCR primers

|              |                             |
|--------------|-----------------------------|
| GFP_F        | CTGCTGCCCCGACAACCAC         |
| GFP_R        | ACCATGTGATCGCGCTTCTC        |
| GFP_probe    | CCAGTCCGCCCTGAGCAAAGACC     |
| Titin_F      | TTCAGTCATGCTGCTAGCGC        |
| Titin_R      | AAAACGAGCAGTGACGTGAGC       |
| Titin_probe  | TGCACGGAAGCGTCTCGTCTCAGTC   |
| Actin_F      | TAGGCACCAGGGTGTGATGG        |
| Actin_R      | CATGGCTGGGGTGTGAAGG         |
| KAP1_F       | CGGAAATGTGAGCGTGTTCTC       |
| KAP1_R       | CGGTAGCCAGCTGATGCAA         |
| Gapdh_F      | TCCATGACAACCTTTGGCATTG      |
| Gapdh_R      | CAGTCTTCTGGGTGGCAGTGA       |
| G9A_F        | AGACAGCCCCTGGGTGAA          |
| G9A_R        | CCCTCGGAGGCTCTCGTT          |
| DNMT1_F      | CCAGGCATTTTCGGCTGAA         |
| DNMT1_R      | CGTTGCAGTCCTCTGTGAACA       |
| DNMT3b_F     | AACTCCATCAGACAGGGCAAA       |
| DNMT3b_R     | CGTCCTTGCCATTCATGACTAC      |
| ESET_F       | TGGCAACAGCGGTTTCAGA         |
| ESET_R       | CAGAAGTTATCATCAGAGCTGTCATCA |
| Zfp809_F     | AATTTGGAGCGTGGATTTGG        |
| Zfp809_R     | GGGAGGCTCCTGCTTGAAG         |
| EeF1a1_F     | AGCAAAAATGACCCACCAATG       |
| EeF1a1_R     | GGCCTGGATGGTTCAGGATA        |
| EeF1a1_probe | CACCTGAGCAGTGAAGCCAGCTGCTT  |

### qPCR copy number primers

|               |                                |
|---------------|--------------------------------|
| HIV_GAG_F     | GGAGCTAGAACGATTCGCAGTTA        |
| HIV_GAG_R     | GGTGTAGCTGTCCCAGTATTTGTC       |
| HIV_GAG_probe | ACAGCCTTCTGATGTTTCTAACAGGCCAGG |
| GFP_F         | CTGCTGCCCCGACAACCAC            |
| GFP_R         | ACCATGTGATCGCGCTTCTC           |
| GFP_probe     | CCAGTCCGCCCTGAGCAAAGACC        |
| Titin_F       | TTCAGTCATGCTGCTAGCGC           |
| Titin_R       | AAAACGAGCAGTGACGTGAGC          |
| Titin_probe   | TGCACGGAAGCGTCTCGTCTCAGTC      |

### Bisulphite pyrosequencing primers

|                        |                          |
|------------------------|--------------------------|
| Oct4_Promoter_F        | AGGGGTGAGAGGATTTTGAA     |
| Oct4_Promoter_biotin_R | CCACCCTCTAACCTTAACCT     |
| Oct4_Promoter_seq      | GGTTGAAAATGAAGTTT        |
| IAP LTR_biotin_F       | GGTTTTGGAATGAGGGATTTT    |
| IAP LTR_R              | CTCTACTCCATATACTCTACCTTC |
| IAP LTR_seq            | ATACTCTACCTTCCCC         |

IAP 5'UTR\_F  
IAP 5'UTR\_biotin\_R  
IAP 5'UTR\_seq  
MND\_F  
MND\_biotin\_R  
MND\_seq  
hPGK\_F  
hPGK\_biotin\_R  
hPGK\_seq

GGGTTGTAGTTAATTAGGGAGTGATA  
ACAATTAATCCTTCTTAACAATCTACTT  
ATTTTGGTTTGTGTGT  
TTAGATGTTTTTAGGGTGTTTTAAGGA  
TCACTCAAAAAAAAAACCCTCCCAAAAAA  
TGATTTTGTGTTTTATTTGAATTAA  
GGTTGGGGTTGAGTTTTTTTTAAGGTA  
CTAAACAACCCCTATTAACCACAACCCAT  
GTTTTTAAGTAGGGAAGGTTTT
